# Supplementary material for: The role of velocity, pressure, and bed stress fluctuations in bed load transport over bed forms: numerical simulation downstream of a backward-facing step
Source: Copernicus journal article supplement (doi:10.5194/esurf-3-105-2015), 2015-02-09
Supplement: Supplementary file 1 [file esurf-3-105-2015-supplement.zip]

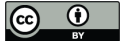

## *Supplement of*

# **The role of velocity, pressure, and bed stress fluctuations in bed load transport over bed forms: numerical simulation downstream of a backward-facing step**

**M. W. Schmeeckle**

*Correspondence to:* M. W. Schmeeckle (schmeeckle@asu.edu)

- esurf-3-105-2015-supplement-cover-letter.pdf
- fig1.avi
- fig5.avi
